# Supplementary material
Source: PubMed Central journal article supplement (PMC1472440)
Supplement: pnas_0602581103_1.pdf [file pnas_0602581103_1.pdf]

Spretus/Ei CCAATTTTTCTTTAGAGACTGAGACCCACATTGTAGCCCATGCTGACCTGACACTCATCA  
NIH CCAATTTTTCTTTAGAGACTGAGACCCACATTGTAGCCCATGCTGACCTGACACTCATCA

Spretus/Ei GGCAGCCCAAGAAAGCCCCAAACAAATTTCCAAGTGTGAGATTTTCAGATGTACACTGCC  
NIH GGCAGCCCAAGAAAGCCCCAAACAAACTTCCAAGTGTGAGATTTTCAGATGTACACTGCC

Spretus/Ei AGTGCCAAGATCTGGATCCAGACACTTGGCTCTAGAGTCTACACTGTGTAACCTCCACTC  
NIH AGTGCCAAGATCTGGATCCAGACACTTGGCTCTAGAGTCTACACTGTGTAACCTCCACTC

Spretus/Ei CCAGATACCAGAGGGAAACAAACTCATTGCCACGGCAGGTCCCCCTTCTTGAAGGTTGCTAT  
NIH CCAGATACCAGAGGGAAACAAACTCATTGCCACGGCAGGTCCCCCTTCTTGAAGGTTGCTAT

GR

Spretus/Ei CCCCCGAACCTTGATGTTCTGGTTCTCATTACAGGGGCCGCATGGAAGCTCCTCTCAGGT  
NIH CCCCCAAACCTTGATGTTCTGGTTCTCATTACAGGGGCCGCATGGAAGCTCCTCTCAGGT

Spretus/Ei GTACGGGAAGGCCAGACACAGGTAGACACACCCCAGATAGGGGACATGGCTTACTGGTCC  
NIH GTACGAGAAGGCCAGACACAGGTAGACACACCCCAGATAGGGGACATGGCTTACTGGTCC

Spretus/Ei CACCCCATTTGACCTGCACTTCGCTACTAAAGGTCTCCAAGGTGGGTACAGGATGACAGGA  
NIH CACCCCATTTGACCTGCACTTCGCTACTAAAGGTCTCCAAGGTGGGTACAGGATGACAGGA

Spretus/Ei CGGGGAGGGGCAGTCAAACCTAAGAGGAGCTGGGCTTGGAAACACCATGGTTGTCTGCTCCC  
NIH TGGGGAGGGGCAGTCAAACCTAAGAGGAGCTGGGCTTGGAAACACCATGGTTGTCTGCTCCC

Spretus/Ei TGTACTTTGTGGGTCCCTTTTCTGGTACAGCCTCCCCTAGAGCCGGTGCATTTGAGGCCTC  
NIH TGTACTTTGTGGGTCCCTTTTCTGGTACAGCCTCCCCTAGAGCAGTGCATTTGAGGCCTC

Spretus/Ei ACCCGAGCTATTCAGAACCCTAGGCCTGTGGAATGTACCAGAGGTTGGGGTAGAGAAGCT  
NIH ACCCGAGCTATTCAGAACCCTAGGCCTGTGGAATGTGCCGAGGTTGGGGTAGAGAAGAT

Spretus/Ei GTCAGGAAGTGGGGGTCAAAGTGGGAGGGGCC ::::::::::::::: ACTGAGGAGGCTGCA  
NIH ATCAGGAAGTGGGGGTCAAAGTGGGAGGGGCCTTTGACTAACGGCCACTGAGGAGGCTGCA

Spretus/Ei TAGGGTAAAGAGAGATAGATAGGGAGGAGAGGGACAGGAAATGGGCCAGTTGCCGTTGCT  
NIH TAGGGTAAAGAGAGATAGATAGGGAGGAGAGGGACAGGAAATGGGCCAGTTGCCGTTGCT

Spretus/Ei CACACAGGCAGAGGTTCTGCTCAAAGGGGAAGTGAGTCTTCGAGGGAGGAGGAGGGTATC  
NIH CACACAGGCAGAGGTTCTGCTCAAAGGGGAAGTGAGTCTTCGAGGGAGGAGGAGGGTATC

Spretus/Ei ATGTCAGCGCAGCTTTTCTGGCTAAAAACACAGCAGATTCTGGGAAACGAGCTGGGCATT  
NIH ATGTCAGTGCAGCTTTTCTGGTTAAAAACACAGCAGATTCTGGGAA :::::::::::::::

Spretus/Ei CAGCAATATGAGGACTGTTGACTGAGCCTACGTCTGTCCAGCTTGAGCAGGGACATCCCC  
NIH ::::::::::: TGAGGACTGTTGACTGAGCCTACGTCTGTCCAGCTTGAGCAGGGACATCCCC

Spretus/Ei AACTAAGAAGGACCCCTCCAAGCCCTGTTCATCAGGGGTTCCATTATAGGTAGAAGATAGAC  
NIH AACTAAGAAGGACCCCTCCAAGCCCTGTTCATCAAGGGTTCATTATAGGTAGAAGATAGAC

Spretus/Ei CTGTTTCCAAATGTGGCTAGCACAGAGGCCCTGGAAACACAGAAGTCATCTCTGATTGGT  
NIH CTGTTTCCAAATGTGGCCAGCACAGAGGCCCTGGAAACACAGAAGTCATCTCTGATTGGT

Spretus/Ei CCCATGGCCTTATAGGGCAGAGCAGTTAGAGTTCTGCTGTAAAGGGCCAAGAGAAGCTAA  
NIH CCCATGGCCTTATAGGGCAGAGCAGTTAGAGTTCTGCTGTAAAGGGCCAAGAGAAGCTAA

Spretus/Ei CTAGGCCCAAGGACAAAAGACAGAGGGTGGAGGCAGAGAGCCGGAGCCAGGTAGAAATGGG  
NIH CTAGGCCCAAGGACAAAAGACAGAGGGTGGAGTTCAGAGAGCTGGAGCCAGGTAGAAATGGG

Spretus/Ei GAGGTGTGTCTCTGGGTATTCGATGTCTGTGGGTGAGAAGGACAGTGGGGGATGAGGCGGC  
NIH GAGGTGTGTCTCTGGGTATTCGCTGTCTGTGGGTGAGAAGGACAGTGGGGGATGAGGCGGC

Spretus/Ei AGGGACAGAATGTAGGGCCTCGACTGCAAAGGCACTAAGACTGATTCTCGAAGGCTCTGG  
NIH AGGGACAGAATGTAAGGCCTCGCTGCAAAGGCACTAAGACTGATTCTCGAAGGCTCTGG

Spretus/Ei GGAGCCCAGGAAGAAATGGATGGATTAGATTCTCCTTCTGAACAATTGTACTAGTTTGTG  
NIH GGAGCCCAGGAAGAAATGGATGGATCAGATTCTCCTTCTGAACAATTGTACTAGTTTGTG

Spretus/Ei AGGGTGACACGTTGGAAGTTTTCTTAGTCCTGGCCTTAGCTGTCTTCCCTCCCTGCTTGC  
NIH AGGGTGATACGTTGGAAGTTTTCTCAGTCCTGGCCTTAGCTGTCTTCCCTCCCTGTTTTGC

Spretus/Ei TTTCTTCTTAGTCTCTCAGCTCACCAACAAACCCTGGCAGCTCTGAAACCCACTTTTTGTT  
NIH TTTCTTCTTAGTCTCTCAGCTCACCAACAAACCCTGGCGGCTCTGAAACCCACTTTTTGTT

Spretus/Ei TCTCACCCCATCCACCCAGCCTTCTCTGTCCATCTTCTCTTTCTGGGACCATTTTTTGT  
NIH TCTCACCCCATCCACCCAGCCTTCTCTGTCCATCTTCTCTTTCTGGGACCATTTTTTGT

Spretus/Ei TTT::GTTTTGTTTTGTTTTGTTTT:::TCAAGACAGGGTTTCTCTGTATAGCCCTGG  
NIH TTTTTGTTTTGTTTTGTTTTGTTTTGTTTTTCAAGACAGGGTTTCTCTGTATAGCCCTGG

Spretus/Ei CTGTCTTGAACTCACTCTATAGACCAGGCTGGCCTCAAACCTCAGAAATCTGCCTGCCTC  
NIH CTGTCTTGAACTCACTCTATAGACCAGGCTGGCCTCAAACCTCAGAAATCTGCCTGCCTC

Spretus/Ei TGCCTCCCAAGTGCTGGGATAAAAAGGCGTGGCCATCACACCCAGCCTTCTGGGACCATT  
NIH TGCCTCCCAAGTGCTGGGATAAAAAGGCGTGGCCACCACGCCAGCCTTCTGGGACCATT

Spretus/Ei CTTTCTTTCTGTCTTCACTGTGCTCTCAGGGTTGGATACTGGACTGGACCCTGGGAGGAC  
NIH CTTTCTTTCTGTCTTCACTGTGCTCTCAGGGTTGGATACTGGACTGGACCCTGGGAGGAC

Spretus/Ei CTAATAACAGCATGTTCTTCTCTGTATGGAACTGCCTGCAGGCCTCCTATCGCTCAAG  
NIH CTAATAACAGCATGTTCTTCTCTGTATGGAACTGCCTGCAGGCCTCCTATCGCTCAAG

Spretus/Ei AGAAAAGCTGGAGCCTTCTCGGCATCACAGGCCATATGGAATCTGGCTGTACCTCTGT  
NIH AGAAAAGCTGGAGCCTTCTCTGGCTCACAGGCCATATGGAATCTGGCTGTACCTCTGT

Spretus/Ei CCTTTGTTCCCCATGACTCCCCGTTCTAGCCTCATTTGGCCCCAGCAGGCTAGCTCCTACT  
NIH CCTTTGTTCCCCACGACTCCCCGTTCTAGCCTCATTTGGCCCCACCAGGCTAGCTCCTACT

Spretus/Ei TCGGAACTTTTGCCTAACTGGATCTGTCATTTCCCTAGGTGCCTAGACAGCCCACTTCT  
NIH TCGGAACTTTTGCCTAACTGGATCTGTCATTTCCCTAGGTGCCTAGACAGCCCACTTCT

Spretus/Ei ATAAGCATTTATGTTGCATCCTGATTGGCTTGTGTTTTGCTTTTTTGGATAGAGTCTCAGAAC  
NIH ATAAGCATTTATGTTGCATCCTGATTGGCTTGTGTTTTGCTTTTTTGGATAGAGTCTCAGAAC

Spretus/Ei ATAGTCCAGCCTAGCCTGGGGCTCAGCAGCCCAAGTGTGTGCCAAAATGTCACCCTTCA  
NIH ATAGTCCAGCCTAGCCTGGGGCTCAGCAGCCCAAGTGTGTGCCAAAATGTCACCCTTCA

Spretus/Ei GATGTGTAGCCCTGGTTGTCTAGAACTCATTTGTGTAGCCAGGCTAGCCTTGAACCTTCT  
NIH GATATGTAGCCCTGGTTGTCTAGAACTCATTTGTGTAGCCAGGCTAGCCTTGAACCTTCT

Spretus/Ei GGGGATCCTCTTGCTCTACCTCCCAAGTGCTGGCATTCAGCTGTACACTGCAGTGTTTC  
NIH GGGGATCCTCTTGCTCTACCTCCCAAGTGCTGGCATTCAGCTGTACACTGCAGTGTTTC

Spretus/Ei AGCCCCAAATGTCACCTTCTTTAGGAAAGCTTCCTTCAGCTGCTCCCCAATTTTTCCAAC  
NIH AGCCCCAAATGTCACCTTCTTTAGGAAAGCTTCCTTCAGCTGCTCCCCAATTTTTCCAAC

Spretus/Ei TACATCTCCACCCCTCCCTTTCTGGCTGTTGTTTTTCCCAGAGCGGTTATCACCATATG  
NIH TACATCTCCACCCCTCCCTTTCTGGCTGTTGTTTTTCCCAGAGCGGTTATCACCATATG

Spretus/Ei ACATACCCTATAAATTTACTTTACTATGTTGGTTGTCTAGGATGTCAGCTTCACGGGG  
NIH ACATACCCTATAAATTTACTTTACTATGTTGGTTGTCTAGGATGTCAGCTTCACGGGG

AP-2

Spretus/Ei CAGGAATTTTTGTCTGCTGTGTTTCATTGCTGTGTCCCAGCCTGGAGAACAGGGCCTGCC  
NIH CAGGAATTTTTGTCTGCTGTGTTTCATTGCTGTGTCCCAGCCTGGANAACAGGGCCTGCC

Spretus/Ei AGGGGAGGGCTTAGGGTTGGGGGGGGG : : : CTGGGCTGCATCTCCAAGCATTGGACTG  
NIH AGGGGAGGGCTTAGGGTTGGGGGGGGGGGGGGCTGGGCTGCATCTCCAAGCATTGGACTG

Spretus/Ei TCAGGCTGGGACACTCAGCTGTGCCTTGAGGCCACTAGAAACCTAACGAAGGGGAGAGAT  
NIH TCAGGCTGGGACACTCAGCTGTGCATTGAGGCCACTAGAAACCTAACGAAGGGGAGAGAT

AP-1

Spretus/Ei GGCTCCACTGGGAAGAAAGGAAATCTGAGTCAGTGGGTGAGAGCAAAGCAAGTCCATG  
NIH GGCTCCACTGGGAAGAAAGGAAATCTGAGTCAGTGGGTGAGAGCAAAGCAAGTCCATG

AP-2

SP-1

AP-2

Spretus/Ei AGGAGTAGGGCGGAAGGGGTCTAAGCTGAGGTGCTGACCTGAGGGCCTGGGAGAGAGAAG  
NIH AGGAGTAGGGCGGAAGGGGTCTAAGCTGAGGTGCTGACCTGAGGGCCTGGGAGAGAGAAG

Spretus/Ei AGACCACAAAGGAAGGTCAGACGAGGCCAGACTTGACTTGAGAGGTTGGACTTTGTACTG  
NIH AGACCACAAAGGGAGGTCAGACGAGGCCAGACTTGACTTGAGAGGTTGGACTTTGTACTG

Spretus/Ei TGGCCCAGGGGAGTCATGGGAGGGTTTTGAGCAAGAGGGTAACTGGATTGCTCTAGATT  
NIH TGGCCCAGGGGAGTCATGGGAGGGTTTTGAGCAAGAGGGTAACTGGATTGCTCTAGATT

Spretus/Ei CCTGTGACTACTATGTGGAGTGGATGGGAGATGAGAACCCAGAGAGGAAATTCAGGCAAT  
NIH CCTGTGACTACTATGTGGAGTGGATGGGAGATGAGAACCCAGAGAGGAAATTCAGGCAAT

Spretus/Ei AATCCAAGGTAAAAGTACTGTGCGAGTCTCCAGAGGTTTCAATGATGGGGACCCGGGAG  
NIH AATCCAAGGTAAAAGTACTGTGCGAGTCTCCAGAGGTTTCAATGATGGGAACCCGGGAG

Spretus/Ei CAGGGTTCTGCCCCTTTGTCCCTTTCTCTAACGCCTCTCGTCCCAGGTTGGCCTCGAC  
NIH CAGGGTTCTGCCCCTTTGTCCCTTTCTCTAACGCCTCTCGTCCCAGGTTGGCCTCGAC

Spretus/Ei TCCATCTCCAGGTGTGGTCCCAGGACAGCTTTGGCCGCTGCCAGCTTGCTGGCTATGGCT  
NIH TCCATCTCCAGGTGTGGTCCCAGGACAGCTTTGGCCGCTGCCAGCTTGCTGGCTATGGCT

AP-2

Spretus/Ei TTTGCCATGTGCCTAGCAGCCAGGCACTCATCAGCTGGACTGCCCTACATGGAGGCCCC  
NIH TTTGCCATGTGCCTAGCAGCCAGGCACTCATCAGCTGGACTGCCCTACATGGAGGCCCC

Spretus/Ei TGGGCAGTTGGAGGGAGCAGCTAGCACGGGCTTTTCGTGGGTGGTGGGCCACAGCTGCTGC  
NIH TGGGCAGTTGGAGGGAGCAGCTAGCACGGGCTTTTCGTGGGTGGTGGGCCACAGCTGCTGC

Spretus/Ei ACGCAGATACCATCTACAGCGGGCTGACCGCTACCGCTGCACACGGCCGCGGGTGGCA  
NIH ACGCAGATACCATCTACAGCGGGCTGACCGCTACCGCTGCACACGGCCGCGGGTGGCA

Spretus/Ei CAGTGACCTTGGTATCGGCCTGCTGCTGCGCCACTTCGATCGCTATGGAGTGGAGTGT  
NIH CAGTGACCTTGGTATCGGCCTGCTGCTGCGCCACTTCGATCGCTATGGAGTGGAGTGT

Spretus/Ei GAGGGACTTCATTGCTACTAATCGCCATCATCCACTGAGCACATAATGGCACAGCAGTGA  
NIH GAGGGACTTCATTGCTACTAATCGCCATCATCCACTGAGCACATAATGGCACAGCAGTGA

c-Myc

Spretus/Ei AGCAGGCACGTGGACTCTGGAGACTGTCAGTCTTGATCACCCCAAGTCATGGCCCCAT  
NIH AGCAGGCACGTGGACTCTGGAGACTGTCAGTCTTGATCACCCCAAGTCATGGCCCCAT

Spretus/Ei GCCATGGACTGCAAGGCCAGGAACTCCCCGTGGGCCATGCTCCACTGAACTACTGGGATA  
NIH GCCATGGACTGCAAGGCCAGGAACTCCCCGTGGGCCATGCTCCACTGAACTACTGGGATA

Spretus/Ei GAAAGGGCTGTGGGTGGAGGGACATGAGCAGGGCCACTGTTTGGACTGTCGGGGGCAC  
NIH GAAAGGGCTGTGGGTGGAGGGACATGAGCAGGGCCACTGTTTGGACTGTCGGGGGCAC

Spretus/Ei TTAATAAAAAGCGTGATTTCTCATGGGTAAGGTGCCTCCTTGTATCCGCTAAAGCTCTCA  
NIH TTAATAAAAAGCGTGATTTCTCATGGGTAAGGTGCCTCCTTGTATCCGCTAAAGCTCTCA

Spretus/Ei GACGTCGGTCTCCTTATTTCACTCTCCTTGACACTCTCATCCGCAAAGTCTGCCCTGCC  
NIH GACGTCGGTCTCCTTATTTCACTCTCCTTGACACTCTCATCCGCAAAGTCTGCCCTGCC

Spretus/Ei TTTTCGCTCTCCACCGCTAGGTCCCCACTTCTAATACAGGACTCTGTTTTCTCACGAAGT  
NIH TTTTCGCTCTCCACCGCTAGGTCCCCACTTCTAATACAGGACTCTGTTTTCTCACGAAGT

Spretus/Ei CCCAATTTTTCTTTGACCCTTCAACAACCTCCCAAATCCACCGGGGCGCTTTGGTTGGTC  
NIH CCCAATTTTTCTTTGACCCTTCAACAACCTCCCAAATCCACCGGGGCGCTTTGGTTGGTC

Spretus/Ei ACCGGCTTTAGTAGTGCTCCGCCGCCAGGAGGCAGCACCCCTGGAGGTGGGGCGAGGCCGG  
NIH ACCGGCTTTAGTAGTGCTCCGCCGCCAGGAGGCAGCACCCCTGGAGGTGGGGCGAGGCCGG

SP-1

SP-1

Spretus/Ei GGTGCCCCGCCCCCTCCCCGCAGGGCTGAAGGGACCCCTTGGAGCCCGCCCACGCTAAG  
NIH GGTGCCCCGCCCCCTCCCCGCAGGGCTGAAGGGACCCCTTGGAGCCCGCCCACGCTAAG

AP-2

SP-1

Spretus/Ei ATGAAGACAGTGCCCCCATGCCCTCCCCCTGGGGCTGCCCCGCCCCGCGCGCGCTTC  
NIH ATGAAGACAGTGCCCCCATGCCCTCCCCCTGGGGCTGCCCCGCCCCGCGCGCGCTTC

AP-2

SP-1

└─▶ T1

Spretus/Ei CTGGGTGGGGCCGGGGCGGCTTCAAAAACCCCGCCGCCAGCCGGTCCC GCCGCCGCC  
NIH CTGGGTGGGGCCGGGGCGGCTTCAAAAACCCCGCCGCCAGCCGGTCCC GCCGCCGCC

SP-1

AP-2

Spretus/Ei CCGCCCTTCGCGCCCAGGCCGTCCCCCTCCTCCTCCCGCCGCGGATCCTCCAGACAGCC  
NIH CCGCCCTTCGCGCCCAGGCCGTCCCCCTCCTCCTCCCGCCGCGGATCCTCCAGACAGCC

Spretus/Ei AGGCCCCCGGCCGGGGCAGGGGGACGCCCTTCGGGGCACCCCGGCTCTGAGCCGCAC  
NIH AGGCCCCCGGCCGGGGCAGGGGGACGCCCTTCGGGGCACCCCGGCTCTGAGCCGCAC

Spretus/Ei TCGGAGTCGGCCTCCGCTGGGAGCCGGCAAAGGAGCAGCCGAGGAGCCGTCCGAGGCCCC  
NIH TCGGAGTCGGCCTCCGCTGGGAGCCGGCAAAGGAGCAGCCGAGGAGCCGTCCGAGGCCCC

Spretus/Ei AGAGTCTGAGACCAGCCGCCCGCAGGGAGGAGGGGAGGAGGAGTGGGAGGAGGGACG  
NIH AGAGTCTGAGACCAGCCGCCCGCAGGGAGGAGGGGAGGAGGAGTGGGAGGAGGGACG

└─▶ T2

Spretus/Ei AGCTGGTTGAGAGAAAGAGGAAAAAAGTTTTGAGACTTTTCCGCTGCTACTGCAAGTCAGA

AGCTGGTTGAGAGAAGAGGAAAAAAGTTTGTGACTTTTCCGCTGCTACTGCAAGTCAGA  
 Spretus/Ei GACGTGGGGACTTCTTGGCACTGCGCTGTCTCGCAAGGAGGCAGGACCTGAGGACTCCAG  
 NIH GACGTGGGGACTTCTTGGCACTGCGCTGTCTCGCAAGGAGGCAGGACCTGAGGACTCCAG

c-Myc PU.1 box

Spretus/Ei ACAGCCCTGCTCACCGTCGTGGACACTCGATCGCTACCCGGCGTTCCACAGACGCCCTA  
 NIH ACAGCCCTGCTCACCGTCGTGGACACTCGATCGCTACCCGGCGTTCCACAGACGCCCTA

Spretus/Ei TTCCGGACCAGCCCTCGGGAGCCACAAACCCCGCCTCCCGCGAAGACTTCACCCCAAAGC  
 NIH TTCCGGACCAGCCCTCGGGAGCCACAAACCCCGCCTCCCGCGAAGACTTCACCCCAAAGC

SP-1 AP-2

Spretus/Ei TGGGGCGCACCCCTTGACGCGCCCTCCCCCAGCCTGCCTCTTGAGTCCCTCGCATCC  
 NIH TGGGGCGCACCCCTTGACGCGCCCTCCCCCAGCCTGCCTCTTGAGTCCCTCGCATCC

Spretus/Ei CAGGACCCTCTCTCCCCGAGAGGCAGATCTCCCTCGGACCTGCTGGCAGTAGCTCCCT  
 NIH CAGGACCCTCTCTCCCCGAGAGGCAGATCTCCCTCGGACCTGCTGGCAGTAGCTCCCT

Spretus/Ei ATTTAAGAACACCCACTTTTGGATCTCAGAGAGCGCTCATCTCGATTTTTTACCCCTGGTG  
 NIH ATTTAAGAACACCCACTTTTGGATCTCAGAGAGCGCTCATCTCGATTTTTTACCCCTGGTG

Spretus/Ei GTATACTGAGACACCTTGGTGTGAGAGCCTACCGCGACTCCTGCTGCTTTCTCCCTCAA  
 NIH GTATACTGAGACACCTTGGTGTGAGAGCCTACCGCGACTCCTGCTGCTTTCTCCCTCAA

ETF

ETF

Spretus/Ei CCTCAAATTATTCAGGACTATCACCTACCTTTCTTGGGAGACCCACCCACCCACCCAC  
 NIH CCTCAAATTATTCAGGACTATCACCTACCTTTCTTGGGAGACCCACCCACCCACCCAC

SP-1

Spretus/Ei ACAAGCCCTGCAGGGGCGGGCCTCCGCATCCACCTTTGCCAGGGTTCGCTCTCCG  
 NIH :AAGCCCTGCAGGGGCGGGCCTCCGCATCCACCTTTGCCAGGGTTCGCTCTCCG

START |→intron 1

Spretus/Ei AAGTGCCGTGGGGCGCCGCTCCCCATG...GTGAGCTCCGAGGGGCCGGGAGCCAGGAGG  
 NIH AAGTGCCGTGGGGCGCCGCTCCCCATG...GTGAGCTCCGAGGGGCCGGGAGCCAGGAGG

Spretus/Ei GAGCCCCAGGGGCGCCGGAGTGCAGGGGTACCCGGGAGGAAATTACCTCAGAGGAAA  
 NIH GAGCCCCAGGGGCGCCGGAGTGCAGGGGTACCCGGGAGGAAATTACCTCAGAGGAAA

Spretus/Ei CTGGCTGGAGGAAGGGAGCCCTGGGGGCACCGGGACAACCTGTGTGGGTGTCCCAAAGAG  
 NIH CTGGCTGGAGGAAGGGAGCCCTGGGGGCACCGGGACAACCTGTGTGGGTGTCCCAAAGAG

Spretus/Ei GCTGGCACTTTCCCGTACCCAGGTGTCTGGTCTTCGAGAGGAATAGACAGCCTGCCAAA  
 NIH GCTGGCACTTTCCCGTACCCAGGTGTCT:::TTGAGAGGAATAGACAGCCTGCCAAA

Spretus/Ei GTGATCCTCTCCTAGAAAAGCAAGATCGTGGGGAGAGTCCCCTCTAGAAGAGGAGCATTT  
 NIH GTGATCCTCTCCTAGAAAAGCAAGATCGTGGGGAGAGTCCCCTCTAGAAGAGGAGCATTT

Spretus/Ei GGCAGGTTTTGTTTTAAGTTCCCCTAATGGTGCCTAAAAATGCAGGGCTCGCTGGGTGGT

NIH GGCAGGTTTTGTTTTAAGTTCCCCTAATGGTGCCATAAAAATGCAGGGCTCGCTGGGTGGT

Spretus/Ei CTCTTTCCAGAAAGGTAGAACCCAGCTCAAGAGAATGGAAGGTGTCCAACATTTTCGGAAT  
NIH CTCTTTCCAGAAAGGTAGAACCCAGCTCAAGAGAATGGAAGGTGTCCAACATTTTCGGAAT

Spretus/Ei GGAGATGCAATGTGGAAAGCCGACCCCAGACCGGGTCGTGAGATGGAGAGAAAACCTAGG  
NIH GGAGATGCAATGTGGAAAGCCGACCCCAGACCGGGTCGTGAGATGGAGAGAAAACCTAGG

Spretus/Ei GGATGGGTACCCTAGAACTGCCAAATAAAAATCTC  
NIH
