# Supplementary material
Source: PubMed Central journal article supplement (PMC1472440)
Supplement: pnas_0602581103_2.pdf [file pnas_0602581103_2.pdf]

| Chromosome 7    |               | <i>P</i> value           | Chromosome 12               |                              |                             |
|-----------------|---------------|--------------------------|-----------------------------|------------------------------|-----------------------------|
|                 |               |                          | <i>D12Nds11</i><br>(17.7Mb) | <i>D12Mit154</i><br>(34.1Mb) | <i>D12Mit68</i><br>(60.7Mb) |
| Marker          | Location (Mb) |                          |                             |                              |                             |
| <i>D7Mit263</i> | 5.4           | 0.008                    | 0.032                       | 0.30                         |                             |
| <i>Ckmm</i>     | 10.9          | 0.006                    | 0.026                       | 0.31                         |                             |
| <i>D7Mit20</i>  | 13.6          | 0.005                    | 0.028                       | 0.33                         |                             |
| <i>Tgfb1</i>    | 14.4          | <b>0.001<sup>a</sup></b> | 0.030                       | 0.32                         |                             |
| <i>D7Mit246</i> | 19.3          | 0.004                    | 0.031                       | 0.31                         |                             |
| <i>D7Mit309</i> | 24.8          | 0.007                    | 0.025                       | 0.30                         |                             |
| <i>D7Mit26</i>  | 31.3          | 0.008                    | 0.032                       | 0.30                         |                             |
| <i>D7Mit69</i>  | 36.5          | 0.02                     | 0.003                       | 0.52                         |                             |
| <i>D7Mit18</i>  | 39.3          | 0.01                     | <b>0.001<sup>b</sup></b>    | 0.37                         |                             |
| Coat color      | 74.6          | 0.028                    | 0.002                       | 0.44                         |                             |
| <i>D7Mit17</i>  | 96.1          | 0.076                    | 0.008                       | 0.77                         |                             |
| <i>D7Mit8</i>   | 109.9         | 0.10                     | 0.003                       | 0.53                         |                             |
| <i>D7Mit43</i>  | 117.9         | 0.58                     | 0.046                       | 0.61                         |                             |
| <i>D7Mit12</i>  | 124.2         | 0.46                     | 0.023                       | 0.87                         |                             |
| <i>D7Mit14</i>  | 130.1         | 0.73                     | 0.12                        | 0.29                         |                             |
| <i>D7Mit140</i> | 131.5         | 0.62                     | 0.13                        | 0.28                         |                             |
